# Supplementary material
Source: PubMed Central journal article supplement (PMC5508337)
Supplement: ct6b01193_si_001.pdf [file ct6b01193_si_001.pdf]

Supporting Information to accompany:

## Behaviour of the Enthalpy of Adsorption in Nanoporous Materials Close to Saturation

Ariana Torres-Knoop<sup>\*1</sup>, Ali Poursaeidesfahani<sup>2</sup>, Thijs J. H. Vlugt<sup>2</sup> and David Dubbeldam<sup>1</sup>

<sup>1</sup>Van 't Hoff Institute for Molecular Sciences, University of Amsterdam, Science Park 904,  
1098XH, Amsterdam, The Netherlands

<sup>2</sup>Delft University of Technology, Process and Energy Department, Leegwaterstraat 39,  
2628CB Delft, The Netherlands

March 14, 2017

<sup>\*</sup>A.TorresKnoop@uva.nl

**Table S1: Variables/parameters definitions**

| General parameters                     |                                                                                                  |
|----------------------------------------|--------------------------------------------------------------------------------------------------|
| $p$                                    | pressure of the system                                                                           |
| $p_0$                                  | pressure of reference state (perfect gas)                                                        |
| $T$                                    | temperature                                                                                      |
| $k_B$                                  | Boltzmann constant                                                                               |
| $\beta$                                | $1/k_B T$                                                                                        |
| $N$                                    | number of adsorbed molecules                                                                     |
| $U$                                    | total energy of the system (host and adsorbed molecules)                                         |
| $\Delta U$                             | difference in the energy between the old and the new configuration                               |
| $V$                                    | volume                                                                                           |
| $R$                                    | gas constant ( $8.314464919 \text{ J mol}^{-1} \text{ K}^{-1}$ )                                 |
| $\Lambda$                              | thermal de Broglie wavelength                                                                    |
| $\lambda$                              | CFCMC non-bonded interactions scaling parameter                                                  |
| $u_{LJ}(r)$                            | Lennard Jones (LJ) energy                                                                        |
| $u_{Coul}(r)$                          | Coulombic energy                                                                                 |
| $\epsilon$                             | LJ strength parameter                                                                            |
| $\sigma$                               | LJ size parameter                                                                                |
| $f$                                    | fugacity of the system                                                                           |
| $\mu_{IG}^0$                           | chemical potential of the reference state (ideal gas)                                            |
| $\epsilon_0$                           | dielectric constant in vacuum                                                                    |
| $q_i, q_j$                             | atomic charges                                                                                   |
| $\Delta\lambda_{\max}$                 | maximum displacement in $\lambda$ -space                                                         |
| $\Delta x_{\max}$                      | maximum displacement of the particles in the adsorbent                                           |
| Langmuir isotherm parameters           |                                                                                                  |
| $n$                                    | amount adsorbed (equilibrium loading)                                                            |
| $m$                                    | Langmuir isotherm model saturation loading                                                       |
| $c$                                    | Langmuir isotherm model parameter                                                                |
| $\nu$                                  | Langmuir-Freundlich isotherm model exponent (heterogeneity factor)                               |
| $k_1, k_2, k_3, k_4$                   | arbitrary constants in the temperature dependence of $m$ and $\nu$                               |
| $A$                                    | constant in the temperature dependence of $c$ (entropic factor)                                  |
| $B$                                    | constant in the temperature dependence of $c$ (enthalpy factor)                                  |
| $m1, m2$                               | dual-Langmuir saturation loading parameters                                                      |
| $c1, c2$                               | dual-Langmuir parameters                                                                         |
| $\nu_1, \nu_2$                         | Langmuir-Freundlich isotherm model exponents                                                     |
| Theoretical model                      |                                                                                                  |
| $\phi$                                 | the total potential for $N$ particles adsorbed                                                   |
| $r$                                    | interparticle distance (same for all neighboring particles)                                      |
| $\langle N \rangle$                    | average number of adsorbed particles                                                             |
| $\langle r \rangle$                    | average interparticle distance                                                                   |
| CFCMC derivation parameters            |                                                                                                  |
| $\langle U_g \rangle$                  | average energy of a single molecule in the gas phase                                             |
| $\langle U_h \rangle$                  | average energy of the host system                                                                |
| $\langle \dots \rangle_\mu$            | average in the grand-canonical ensemble                                                          |
| $\langle \dots \rangle_{\text{CFCMC}}$ | average in the grand-canonical CFCMC ensemble                                                    |
| $Q_{\text{CFCMC}}$                     | partition function CFCMC-ensemble                                                                |
| $U_{\text{CFCMC}}$                     | total energy of the system (including the fractional particle) obtained using CFCMC algorithm    |
| $N_{\text{CFCMC}}$                     | total number of particles (including the fractional particle) obtained using the CFCMC algorithm |
| $U_{\text{int}}$                       | total energy of the integer particles in CFCMC                                                   |
| $U_{\text{frac}}$                      | total energy of the fractional particle in CFCMC                                                 |
| $U_{\text{total}}$                     | total energy of the system (integer + fractional particles), same as $U_{\text{CFCMC}}$ ??       |
| $N_{\text{int}}$                       | total number of integer particles in CFCMC                                                       |
| $\eta(\lambda)$                        | biasing in $\lambda$ -space                                                                      |
| $\delta_{\lambda=0}$                   | Dirac delta at $\lambda = 0$                                                                     |
| Thermodynamic parameters               |                                                                                                  |
| $Q$                                    | heat of adsorption                                                                               |
| $\Delta\bar{h}$                        | differential enthalpy of adsorption                                                              |
| $\Delta h_{\text{ads}}$                | isosteric enthalpy of adsorption                                                                 |
| $\Delta H$                             | enthalpy of adsorption                                                                           |
| $\Delta G$                             | free energy between the fluid phase and the adsorbed phase                                       |
| $\Delta S$                             | entropy of adsorption                                                                            |
| $\Delta H_{\text{imm}}$                | enthalpy changes associated with isothermal immersion                                            |
| $\Delta H_{\text{comp}}$               | enthalpy changes associated with isothermal compression                                          |
| $\Delta S_{\text{imm}}$                | entropy changes associated with isothermal immersion                                             |
| $\Delta S_{\text{comp}}$               | entropy changes associated with isothermal compression                                           |
| $\Delta G_{\text{imm}}$                | free energy changes associated with isothermal immersion                                         |
| $\Delta G_{\text{comp}}$               | free energy changes associated with isothermal compression                                       |
| $\Delta F_{\text{imm}}$                | helmholtz free energy changes associated with isothermal immersion                               |
| $\Delta F_{\text{comp}}$               | helmholtz free energy changes associated with isothermal compression                             |
| $\Omega$                               | grand potential, free energy change associated with the isothermal immersion                     |
| $\mu_s$                                | chemical potential of the adsorbent in its clean state in vacuo (unadsorbed)                     |
